# Supplementary material
Source: MDPI journal article supplement (https://www.mdpi.com/2073-4352/9/10/522)
Supplement: s1 [file s1]

## Supplementary Information

Table S1. Compiled Dimer Classification of 1,3-bis(4-ethynyl-3-iodopyridinium)-benzene Halogen Bond Donors.

| Anion (solvent)        | Dimer                                                         | Receptor Conformation |
|------------------------|---------------------------------------------------------------|-----------------------|
| Tetrafluoroborate      | centered antiparallel                                         | Bidentate             |
| Bromide                | centered antiparallel                                         | Bidentate             |
| Iodide                 | centered antiparallel                                         | Bidentate             |
| Nitrate (Methanol)     | centered antiparallel                                         | Bidentate             |
| Perrhenate             | centered antiparallel                                         | Bidentate             |
| Triflate (DMF)         | 'slipped' centered antiparallel                               | Bidentate             |
| Chloride               | 'slipped' centered antiparallel and off-centered antiparallel | Bidentate             |
| Hydrogen Sulfate       | centered parallel dimer and off-centered antiparallel         | W                     |
| Triflate               | off-centered antiparallel                                     | W                     |
| Triiodide              | off-centered antiparallel                                     | W                     |
| Thiocyanate (Methanol) | off-centered antiparallel                                     | W                     |
| Thiocyanate (DCM)      | off-centered antiparallel                                     | S                     |

Images of reported structures with atomic numbering scheme.

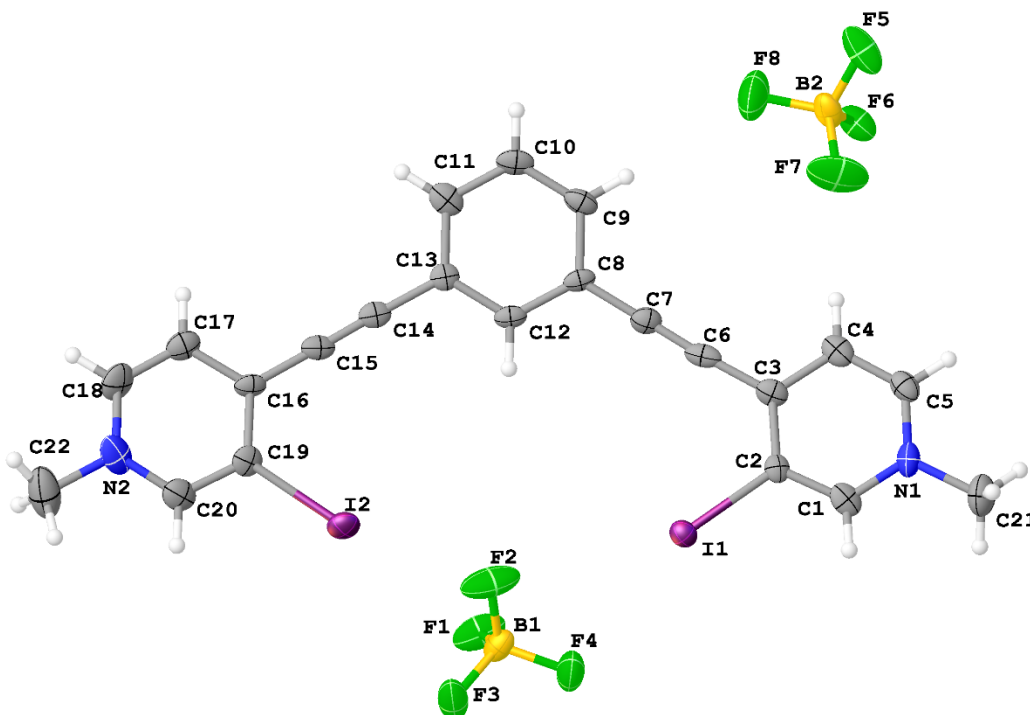

Figure S1. Complex 1 with atomic numbering scheme. Thermal ellipsoids drawn at the 50% probability level. Anion disorder omitted for clarity.

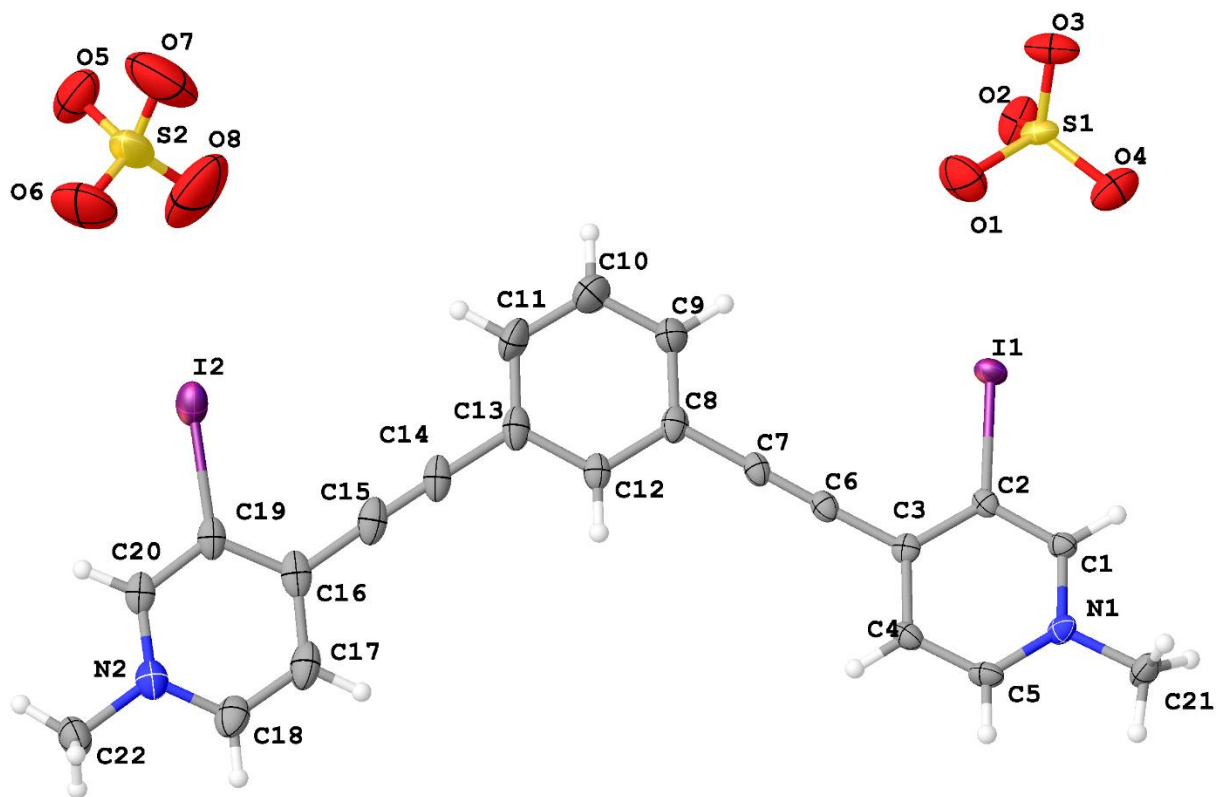

Figure S2. Complex 2 with atomic numbering scheme. Thermal ellipsoids drawn at the 50% probability level. Anion disorder omitted for clarity.

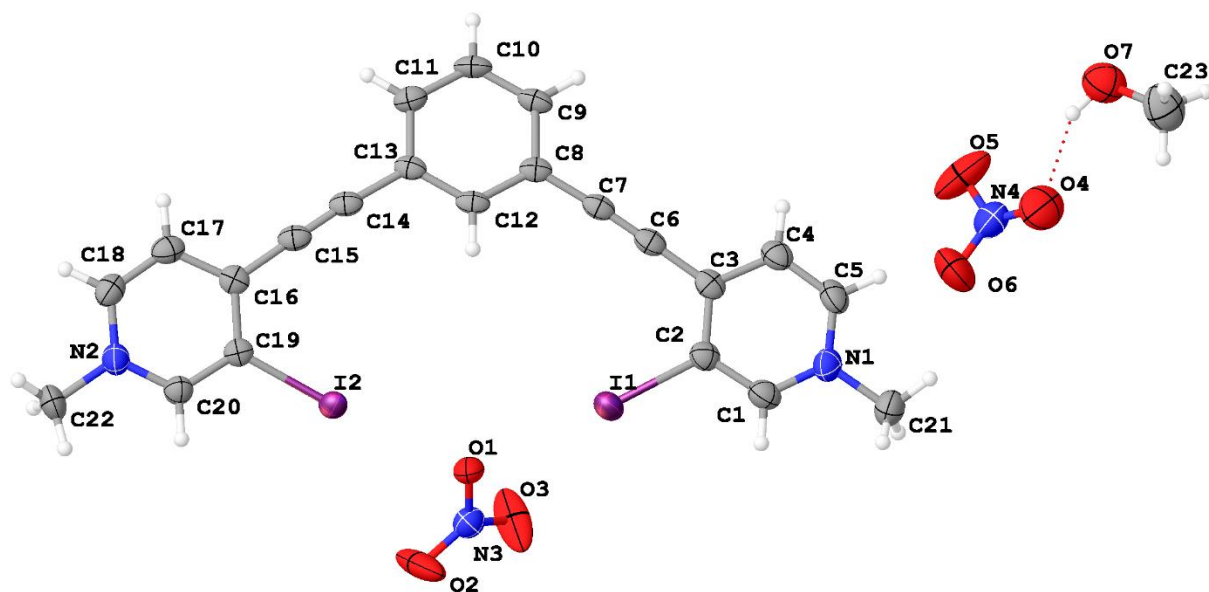

Figure S3. Complex 3•MeOH with atomic numbering scheme. Thermal ellipsoids drawn at the 50% probability level. Anion disorder omitted for clarity.
